# Supplementary material
Source: PubMed Central journal article supplement (PMC3201846)

## **Supplementary Materials**

- 1. Study inclusion flow diagram**
- 2. Excluded study effect sizes**
- 3. Funnel plots**

### Study inclusion flow diagram.

The final sample for the meta-analysis included 46 studies yielding 64 comparisons ( $N = 56,013$ ).

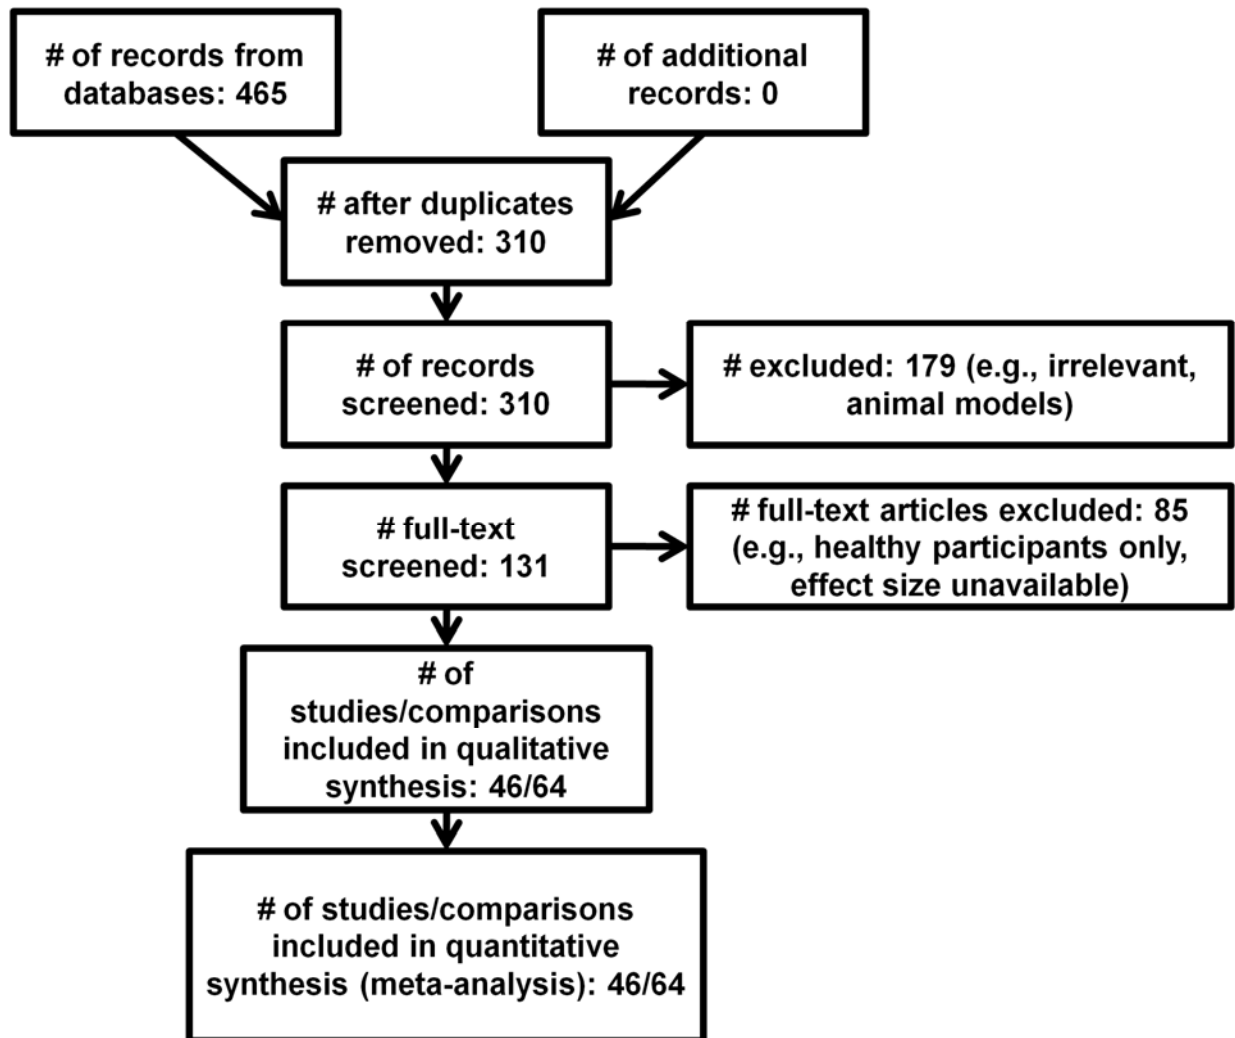

**Table S1. Effect sizes of studies assessing delayed reward discounting using 1, 2, or 3 items.**

| <b>Study</b>            | <b><i>d</i></b> | <b><i>Z</i></b> | <b><i>p</i></b> |
|-------------------------|-----------------|-----------------|-----------------|
| Bradford, 2009          | .21             | 2.61            | .009            |
| Brettville-Jensen, 1999 | .68             | 4.89            | <.001           |
| Reimers et al., 2009a   | .22             | 19.34           | <.001           |
| Reimers et al., 2009b   | .11             | 5.83            | <.001           |
| Reimers et al., 2009c   | .04             | 3.78            | <.001           |
| Rossow et al., 2008a    | .16             | 3.29            | <.001           |
| Rossow et al., 2008b    | .15             | 3.29            | .001            |

**Funnel Plots.** Funnel plots of the primary meta-analytic sample and subsamples. Each plot reflects the relationship between effect size (X axis), Cohen's (1988)  $d$ , and the standard error (Y axis), which incorporates variability and sample size. Imputed studies and adjusted effect sizes are provided in black. The individual panels depict the following: A) Overall primary meta-analytic sample; B) Studies using clinical criterion groups; C) Studies using subclinical criterion groups; D) Studies on tobacco dependence; E) Studies on alcohol dependence; F) Studies on opiate dependence; G) Studies on pathological gambling; H) Studies on stimulant dependence; I) Studies using criterion groups of mixed types of addictive behavior.

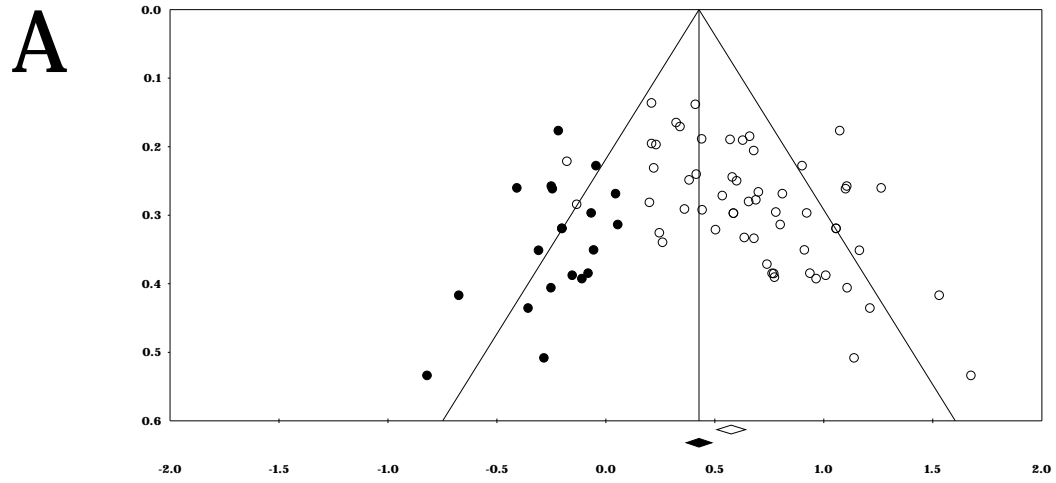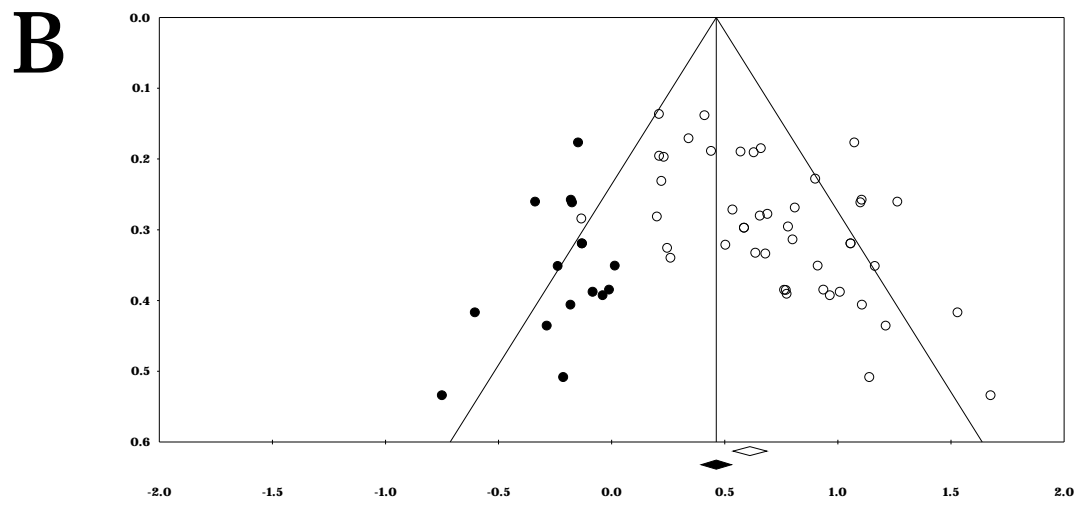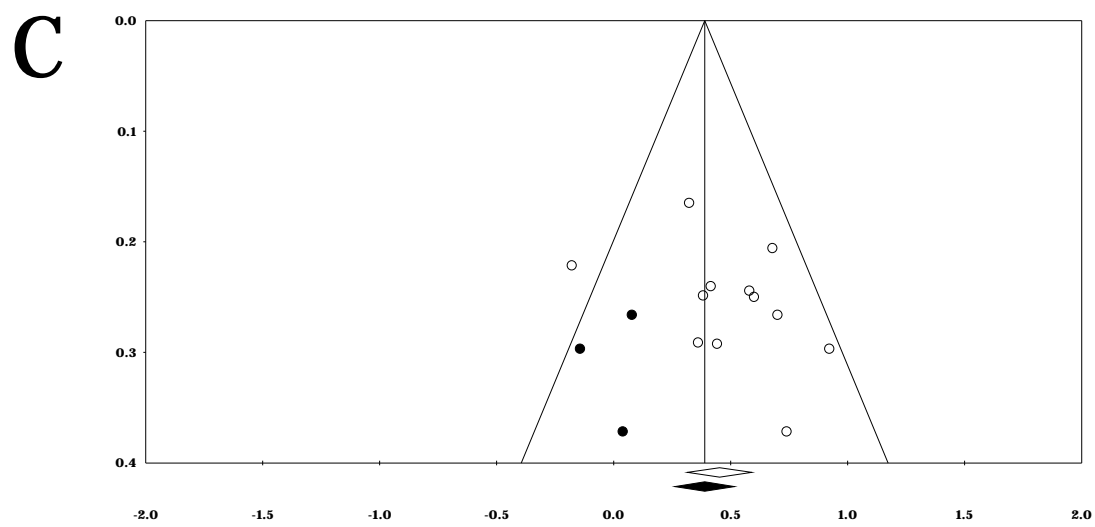

**D**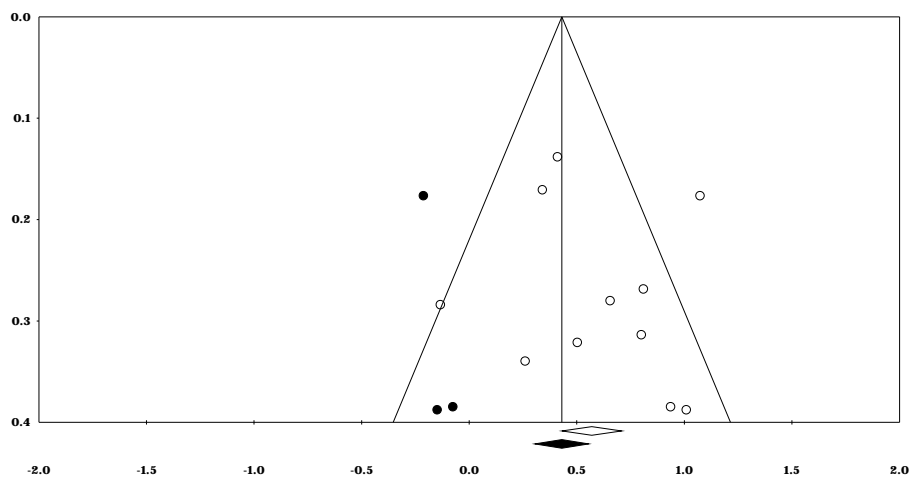**E**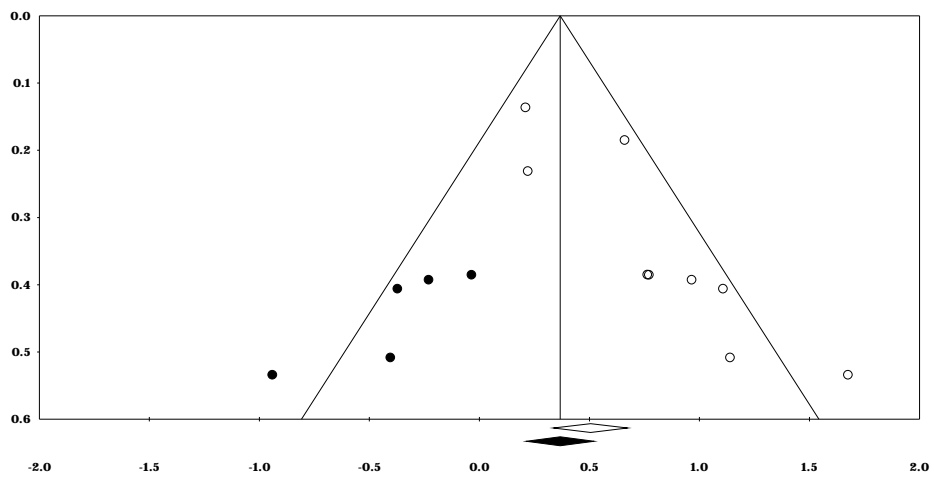**F**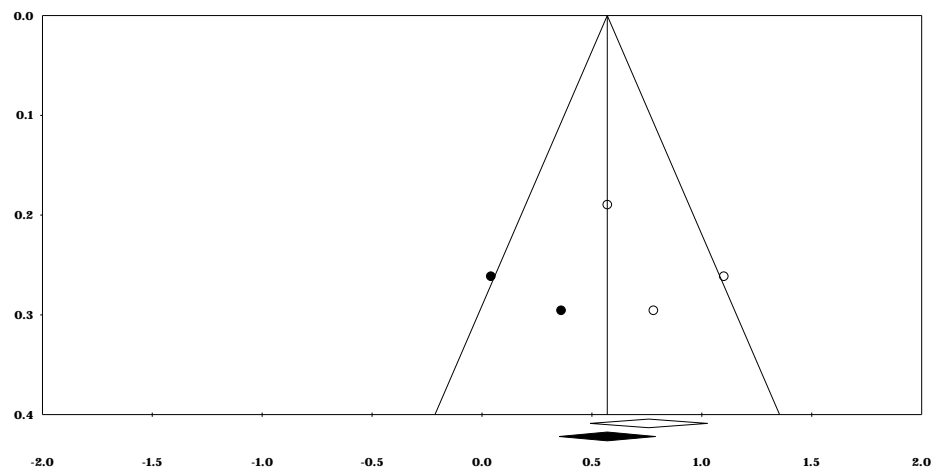

# G

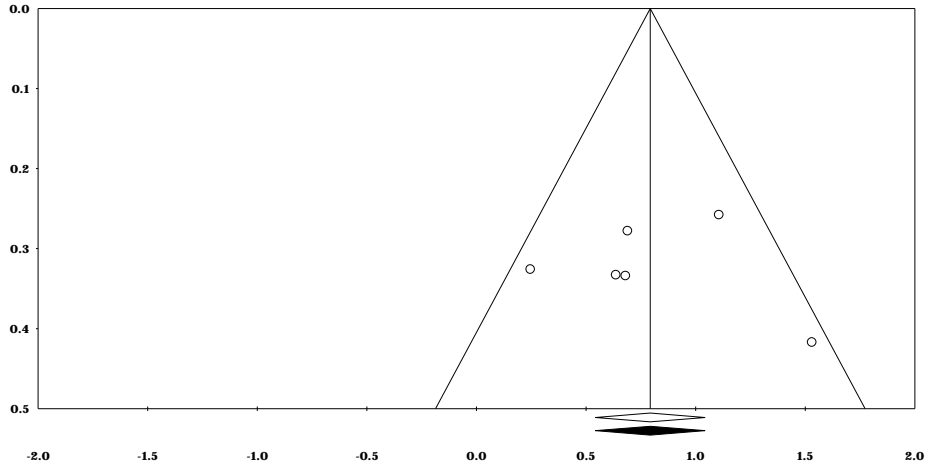

# H

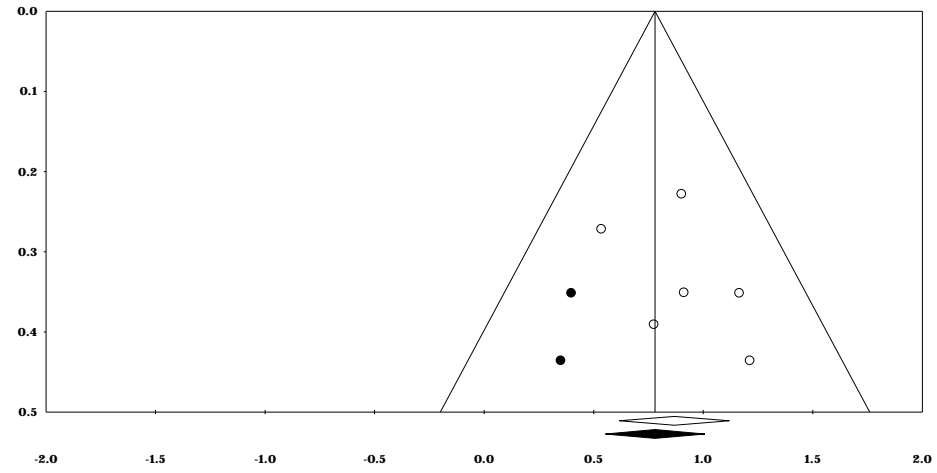

# I

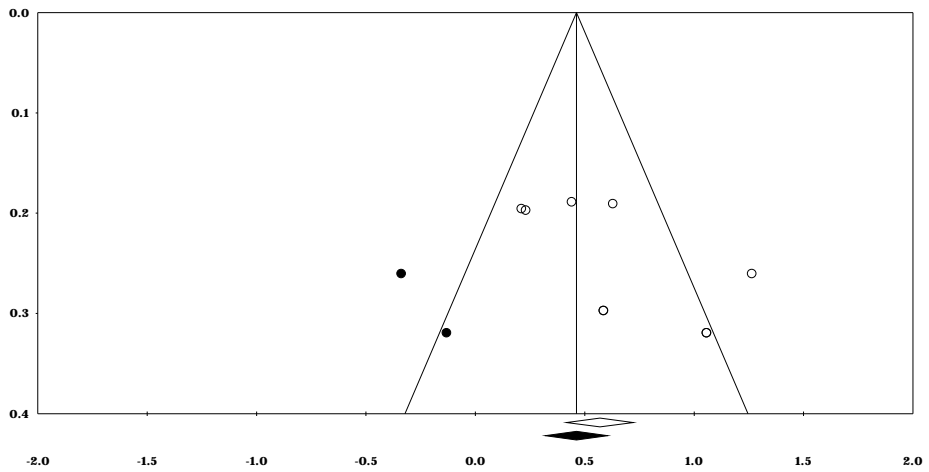

Supplement: NIHMS291311-supplement-1.pdf [file NIHMS291311-supplement-1.pdf]
